# Supplementary figures and images for: Optimizing Wastewater Treatment with PVA Gel Beads and Pumice Stones: A Multi-Stage Reactor Approach
Source: Research Square preprint supplement (doi:10.21203/rs.3.rs-5786466/v1), 2025-02-21

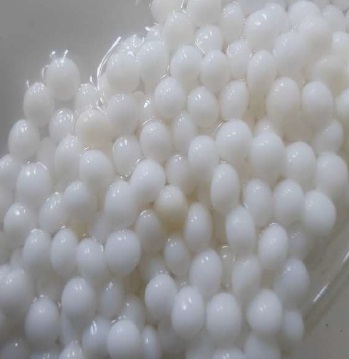


Figure 1. PVA Gel Beads

Supplement: Supplementary file 1 [file 868ce42c0df1563f8e253f87.docx]
